# Supplementary material for: Targeting Microglia/Macrophages Notch1 Protects Neurons from Pyroptosis in Ischemic Stroke
Source: MDPI journal article supplement (doi:10.3390/brainsci13121657), 2023-11-29
Supplement: s1 [file s1]

Flow immunoassay of myeloid cells

Figure S1

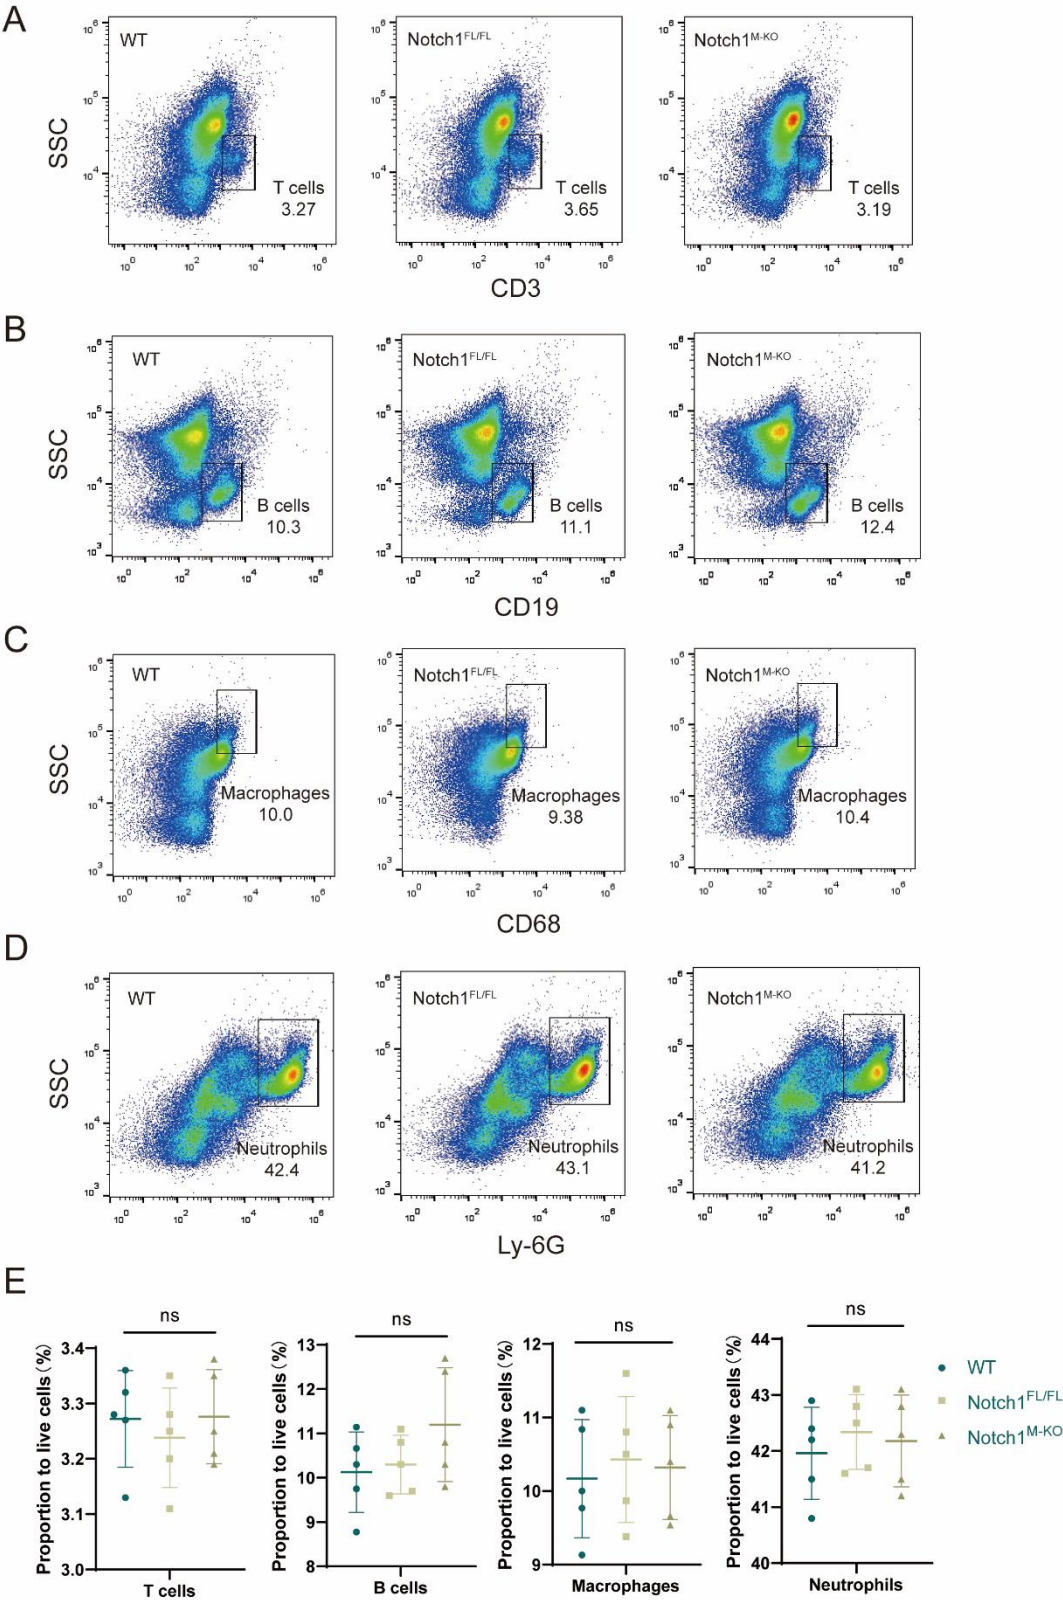

### Figure S1

(A) Gating strategy to identify T cells (CD3+). (B) Gating strategy to identify B cells (CD19+). (C) Gating strategy to identify macrophages (CD68+). (D) Gating strategy to identify neutrophils (Ly6G+). (E) Statistical analyses of the proportion of T cells, B cells, macrophages and neutrophils to total live cells (%). (n=5 mice/group), Mean  $\pm$  SD. ns: no statistical difference.

| Antibody | Company        | Catalogue# | Fluorochrome                 |
|----------|----------------|------------|------------------------------|
| CD3      | BD Biosciences | 561798     | FITC                         |
| CD19     | Biolegend      | 115528     | Alexa Fluor <sup>®</sup> 700 |
| CD68     | Biolegend      | 137010     | PerCP/Cy5.5                  |
| Ly6G     | BD Biosciences | 551461     | PE                           |

### Figure S2

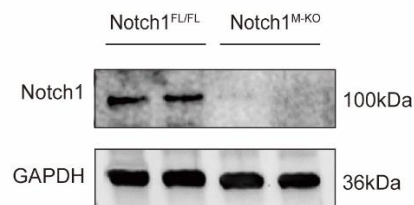

### Figure S2

Representative Western blot bands of protein Notch1 in myeloid cells of Notch1<sup>M-KO</sup> mice and Notch1<sup>FL/FL</sup> mice.
